# Supplementary material
Source: HighWire-hosted journal article supplement (https://openheart.bmj.com/content/9/2/e002056)
Supplement: inline-supplementary-material-1 [file inline-supplementary-material-1.pdf]

## Supplemental Material

### Index

Page 2, Supplemental Table 1

Page 3, Supplemental Table 2

Page 4, Supplemental Table 3

Page 5, Supplemental Table 4

Page 7, Supplemental Table 5

Page 9, Supplemental Figure 1

Page 9, Supplemental Figure 2

Page 10, Supplemental Figure 3

Page 11, Supplemental Figure 4

Page 12, Supplemental Figure 5

Page 13, Supplemental Appendix

Page 14, References

**Abbreviations:** ATC, anatomical therapeutic chemical system; CI, confidence interval; cLQTS, congenital long QT syndrome; ICD-10, international classification of diseases system, 10<sup>th</sup> revision; ISCED, international standard classification of education; IQR, interquartile range; VT, ventricular tachycardia

**Supplemental Table 1**

**Title: Baseline characteristics, patients with cLQTS attached to the workforce (cases) and patients with cLQTS not attached to the workforce (not included)**

|                                                                            | cLQTS patients<br>attached to the<br>workforce (n=298) | cLQTS patients not<br>attached to the<br>workforce (n=44) | p-value  |
|----------------------------------------------------------------------------|--------------------------------------------------------|-----------------------------------------------------------|----------|
| Sex (female)                                                               | 192 (64.4)                                             | 29 (65.9)                                                 | 0.98     |
| Age at diagnosis, years (median (IQR))                                     | 38.6 [28.0, 47.9]                                      | 45.2 [39.8, 53.6]                                         | 0.0001   |
| <b>Social factors</b>                                                      |                                                        |                                                           |          |
| Education level                                                            |                                                        |                                                           | 0.07     |
| - Basic school <10 years (ISCED 0-2)                                       | 62 (22.3)                                              | 16 (36.4)                                                 |          |
| - High school or vocational education (ISCED 3)                            | 130 (46.8)                                             | 20 (45.5)                                                 |          |
| - Higher education (ISCED 5-8)                                             | 86 (30.9)                                              | 8 (18.2)                                                  |          |
| Living alone                                                               | 103 (35.0)                                             | 17 (38.6)                                                 | 0.77     |
| Income                                                                     |                                                        |                                                           | 0.002    |
| - 1. quartile (lowest)                                                     | 75 (25.2)                                              | 5 (11.4)                                                  |          |
| - 2. quartile                                                              | 74 (24.8)                                              | 23 (52.3)                                                 |          |
| - 3. quartile                                                              | 74 (24.8)                                              | 8 (18.2)                                                  |          |
| - 4. quartile (highest)                                                    | 75 (25.2)                                              | 8 (18.2)                                                  |          |
| <b>Disease factors</b>                                                     |                                                        |                                                           |          |
| Disease manifestation                                                      |                                                        |                                                           | 0.25     |
| - Aborted cardiac arrest                                                   | 26 (8.7)                                               | 6 (13.6)                                                  |          |
| - VT or syncope                                                            | 59 (19.8)                                              | 12 (27.3)                                                 |          |
| - Unspecified                                                              | 130 (43.6)                                             | 19 (43.2)                                                 |          |
| - Asymptomatic                                                             | 83 (27.9)                                              | 7 (15.9)                                                  |          |
| <b>Comorbidities prior to date of diagnosis</b>                            |                                                        |                                                           |          |
| Diabetes                                                                   | 12 (4.0)                                               | ≤3                                                        | 1.00     |
| Hypertension                                                               | 31 (10.4)                                              | 14 (31.8)                                                 | 0.0002   |
| Ischemic heart disease or prior myocardial infarction                      | 12 (4.0)                                               | 7 (15.9)                                                  | 0.004    |
| Atrial fibrillation                                                        | 7 (2.3)                                                | ≤3                                                        | 0.24     |
| Epilepsy                                                                   | 4 (1.3)                                                | ≤3                                                        | 1.00     |
| Any psychiatric diagnosis                                                  | 23 (7.7)                                               | 13 (29.5)                                                 | < 0.0001 |
| <b>Concomitant pharmacotherapy, &lt;90 days prior to date of diagnosis</b> |                                                        |                                                           |          |
| Beta-blockers                                                              | 89 (29.9)                                              | 20 (45.5)                                                 | 0.06     |
| Calcium antagonists                                                        | 7 (2.3)                                                | 6 (13.6)                                                  | 0.001    |
| ACE inhibitors                                                             | 12 (4.0)                                               | 6 (13.6)                                                  | 0.02     |
| Thiazides                                                                  | 6 (2.0)                                                | ≤3                                                        | 0.61     |
| Lipid lowering drugs                                                       | 11 (3.7)                                               | 7 (15.9)                                                  | 0.003    |
| Antiepileptics                                                             | 6 (2.0)                                                | 5 (11.4)                                                  | 0.005    |
| Antidepressants                                                            | 14 (4.7)                                               | 9 (20.5)                                                  | 0.0004   |
| Anxiolytics                                                                | 10 (3.4)                                               | 9 (20.5)                                                  | < 0.0001 |

Supplemental Table 2

Title: Baseline characteristics, patients with cLQTS stratified by disease manifestation

|                                                                            | Aborted<br>cardiac arrest<br>(n=27) | VT or<br>syncope<br>(n=58) | Unspecified<br>(n=130) | Asymptomatic<br>(n=83) | p-value |
|----------------------------------------------------------------------------|-------------------------------------|----------------------------|------------------------|------------------------|---------|
| Sex (female)                                                               | 18 (66.7)                           | 45 (77.6)                  | 82 (63.1)              | 47 (56.6)              | 0.08    |
| Age at diagnosis, years (median (IQR))                                     | 39.6 [26.6,<br>50.1]                | 39.1 [25.3,<br>49.8]       | 36.6 [28.8, 47.9]      | 38.5 [27.9, 45.9]      | 0.89    |
| <b>Social factors</b>                                                      |                                     |                            |                        |                        |         |
| Education level at diagnosis                                               |                                     |                            |                        |                        | 0.60    |
| - Basic school <10 years (ISCED 0-2)                                       | 6 (26.1)                            | 13 (23.6)                  | 31 (25.6)              | 12 (15.2)              |         |
| - High school or vocational education (ISCED 3)                            | 12 (52.2)                           | 26 (47.3)                  | 51 (42.1)              | 41 (51.9)              |         |
| - Higher education (ISCED 5-8)                                             | 5 (21.7)                            | 16 (29.1)                  | 39 (32.2)              | 26 (32.9)              |         |
| Living alone                                                               | 13 (48.1)                           | 24 (42.1)                  | 47 (37.0)              | 19 (22.9)              | 0.03    |
| Employment status at baseline                                              |                                     |                            |                        |                        | 0.90    |
| - Employed                                                                 | 22 (81.5)                           | 43 (74.1)                  | 102 (78.5)             | 63 (75.9)              |         |
| - Study, maternity leave, vacation                                         | ≤3                                  | 9 (15.5)                   | 18 (13.8)              | 14 (16.9)              |         |
| - Unemployed                                                               | ≤3                                  | 6 (10.3)                   | 10 (7.7)               | 6 (7.2)                |         |
| Income                                                                     |                                     |                            |                        |                        | 0.59    |
| - 1. quartile (lowest)                                                     | 10 (37.0)                           | 17 (29.3)                  | 29 (22.3)              | 19 (22.9)              |         |
| - 2. quartile                                                              | 6 (22.2)                            | 15 (25.9)                  | 35 (26.9)              | 18 (21.7)              |         |
| - 3. quartile                                                              | ≤3                                  | 15 (25.9)                  | 31 (23.8)              | 25 (30.1)              |         |
| - 4. quartile (highest)                                                    | 8 (29.6)                            | 11 (19.0)                  | 35 (26.9)              | 21 (25.3)              |         |
| <b>Comorbidities prior to date of diagnosis</b>                            |                                     |                            |                        |                        |         |
| Diabetes                                                                   | ≤3                                  | ≤3                         | 6 (4.6)                | ≤3                     | 0.83    |
| Hypertension                                                               | ≤3                                  | 9 (15.5)                   | 15 (11.5)              | 4 (4.8)                | 0.20    |
| Ischemic heart disease or prior myocardial infarction                      | ≤3                                  | ≤3                         | 8 (6.2)                | 0                      | 0.12    |
| Atrial fibrillation                                                        | ≤3                                  | ≤3                         | ≤3                     | 0                      | 0.008   |
| Epilepsy                                                                   | ≤3                                  | 0                          | ≤3                     | ≤3                     | 0.58    |
| Any psychiatric diagnosis                                                  | ≤3                                  | 6 (10.3)                   | 11 (8.5)               | 5 (6.0)                | 0.66    |
| <b>Concomitant pharmacotherapy, &lt;90 days prior to date of diagnosis</b> |                                     |                            |                        |                        |         |
| Beta blockers                                                              | 5 (18.5)                            | 18 (31.0)                  | 47 (36.2)              | 19 (22.9)              | 0.11    |
| Calcium antagonists                                                        | 0                                   | ≤3                         | 4 (3.1)                | ≤3                     | 0.63    |
| ACE inhibitors                                                             | ≤3                                  | 5 (8.6)                    | 4 (3.1)                | ≤3                     | 0.26    |
| Thiazides                                                                  | 0                                   | ≤3                         | ≤3                     | ≤3                     | 0.27    |
| Lipid lowering drugs                                                       | ≤3                                  | ≤3                         | 7 (5.4)                | ≤3                     | 0.56    |
| Antiepileptics                                                             | ≤3                                  | ≤3                         | ≤3                     | 0                      | 0.004   |
| Antidepressants                                                            | ≤3                                  | ≤3                         | 8 (6.2)                | ≤3                     | 0.64    |
| Anxiolytics                                                                | ≤3                                  | ≤3                         | ≤3                     | ≤3                     | 0.61    |

**Supplemental Table 3****Title:** Findings in the patients with cLQTS with additional clinical information available

|                              | Patients with cLQTS (n=156) |
|------------------------------|-----------------------------|
| Sex (female)                 | 105 (67.3)                  |
| Age at diagnosis, years      | 38.3 [25.3, 46.9]           |
| Proband                      | 65 (41.7)                   |
| Relative                     | 91 (58.3)                   |
| <b>Genetics</b>              |                             |
| KCNQ1                        | 41 (26.3)                   |
| KCNH2                        | 75 (48.1)                   |
| SCN5A                        | 11 (7.1)                    |
| Genonegative                 | 18 (11.5)                   |
| Not tested                   | 8 (5.1)                     |
| <b>Disease manifestation</b> |                             |
| ACA                          | 20 (12.8)                   |
| VT/syncope                   | 44 (28.2)                   |
| Unspecified                  | 9 (5.8)                     |
| Asymptomatic                 | 82 (53.2)                   |

**Supplemental Table 4**

**Title: Baseline characteristics, patients with cLQTS attached to the workforce and patients with cLQTS not attached to the workforce or dead six months after diagnosis**

|                                                                            | Attached to the workforce (n=271) | Not attached to the workforce or dead (n=27) | p-value |
|----------------------------------------------------------------------------|-----------------------------------|----------------------------------------------|---------|
| Sex (female)                                                               | 174 (65.2)                        | 18 (66.6)                                    | 0.97    |
| Age at diagnosis, years (median [IQR])                                     | 38.2 [28.0, 47.8]                 | 40.5 [28.8, 49.5]                            | 0.63    |
| <b>Social factors</b>                                                      |                                   |                                              |         |
| Education level                                                            |                                   |                                              |         |
| - Basic school <10 years (ISCED 0-2)                                       | 56 (22.0)                         | 6 (25.0)                                     | 0.87    |
| - High school or vocational education (ISCED 3)                            | 120 (47.2)                        | 10 (41.7)                                    |         |
| - Higher education (ISCED 5-8)                                             | 78 (30.7)                         | 8 (33.3)                                     |         |
| Living alone                                                               | 94 (35.2)                         | 9 (33.3)                                     | 1       |
| Employment status 30 days prior to date of diagnosis                       |                                   |                                              |         |
| - Employed                                                                 | 208 (76.8)                        | 22 (81.5)                                    | 0.14    |
| - Study, maternity leave, vacation                                         | 42 (15.5)                         | ≤3                                           |         |
| - Unemployed                                                               | 21 (7.7)                          | 4 (14.8)                                     |         |
| Income                                                                     |                                   |                                              |         |
| - 1. quartile (lowest)                                                     | 66 (24.4)                         | 9 (33.3)                                     | 0.71    |
| - 2. quartile                                                              | 67 (24.7)                         | 7 (25.9)                                     |         |
| - 3. quartile                                                              | 69 (25.5)                         | 5 (18.5)                                     |         |
| - 4. quartile (highest)                                                    | 69 (25.5)                         | 6 (22.2)                                     |         |
| <b>Disease factors</b>                                                     |                                   |                                              |         |
| Disease manifestation                                                      |                                   |                                              |         |
| - Aborted cardiac arrest                                                   | 17 (6.3)                          | 10 (37.0)                                    | <0.0001 |
| - VT or syncope                                                            | 49 (18.1)                         | 9 (33.3)                                     |         |
| - Unspecified                                                              | 125 (46.1)                        | 5 (18.5)                                     |         |
| - Asymptomatic                                                             | 80 (29.5)                         | ≤3                                           |         |
| <b>Comorbidities prior to date of diagnosis</b>                            |                                   |                                              |         |
| Diabetes                                                                   | 9 (3.3)                           | ≤3                                           | 0.15    |
| Hypertension                                                               | 28 (10.3)                         | ≤3                                           | 1       |
| Ischemic heart disease or prior myocardial infarction                      | 10 (3.7)                          | ≤3                                           | 0.67    |
| Atrial fibrillation                                                        | 6 (2.2)                           | ≤3                                           | 1       |
| Epilepsy                                                                   | ≤3                                | ≤3                                           | 0.81    |
| Any psychiatric diagnosis                                                  | 21 (7.7)                          | ≤3                                           | 1       |
| <b>Concomitant pharmacotherapy, &lt;90 days prior to date of diagnosis</b> |                                   |                                              |         |
| Beta blockers                                                              | 80 (29.5)                         | 9 (33.3)                                     | 0.85    |
| Calcium antagonists                                                        | 7 (2.6)                           | 0                                            | 0.86    |
| ACE inhibitors                                                             | 10 (3.7)                          | ≤3                                           | 0.67    |
| Tiazides                                                                   | 5 (1.8)                           | ≤3                                           | 1       |

|                       |          |    |      |
|-----------------------|----------|----|------|
| Lipid lowering agents | 11 (4.1) | 0  | 0.60 |
| Antiepileptics        | 4 (1.5)  | ≤3 | 0.17 |
| Anxiolytics           | 8 (3.0)  | ≤3 | 0.51 |
| Antidepressants       | 13 (4.8) | ≤3 | 1    |

**Supplemental Table 5**

**Title: Baseline characteristics, patients with cLQTS attached to the workforce and patients with cLQTS not attached to the workforce or dead one year after diagnosis**

|                                                                            | Attached to the workforce (n=278) | Not attached to the workforce or dead (n=20) | p-value |
|----------------------------------------------------------------------------|-----------------------------------|----------------------------------------------|---------|
| Sex (female)                                                               | 182 (65.5)                        | 10 (50.0)                                    | 0.25    |
| Age at diagnosis, years (median [IQR])                                     | 37.5 [27.9, 47.8]                 | 44.5 [33.2, 50.4]                            | 0.13    |
| <b>Social factors</b>                                                      |                                   |                                              |         |
| Education level at diagnosis                                               |                                   |                                              |         |
| - Basic school <10 years (ISCED 0-2)                                       | 59 (22.5)                         | ≤3                                           |         |
| - High school or vocational education (ISCED 3)                            | 123 (46.9)                        | 7 (43.8)                                     |         |
| - Higher education (ISCED 5-8)                                             | 80 (30.5)                         | 6 (37.5)                                     | 0.83    |
| Living alone                                                               | 95 (34.7)                         | 8 (40.0)                                     | 0.81    |
| Employment status 30 days prior to date of diagnosis                       |                                   |                                              |         |
| - Employed                                                                 | 213 (76.6)                        | 17 (85.0)                                    |         |
| - Study, maternity leave, vacation                                         | 43 (15.5)                         | 0                                            |         |
| - Unemployed                                                               | 22 (7.9)                          | ≤3                                           | 0.11    |
| Income                                                                     |                                   |                                              |         |
| - 1. quartile (lowest)                                                     | 70 (25.2)                         | 5 (25.0)                                     |         |
| - 2. quartile                                                              | 66 (23.7)                         | 8 (40.0)                                     |         |
| - 3. quartile                                                              | 71 (25.5)                         | ≤3                                           |         |
| - 4. quartile (highest)                                                    | 71 (25.5)                         | 4 (20.0)                                     | 0.38    |
| <b>Disease factors</b>                                                     |                                   |                                              |         |
| Disease manifestation                                                      |                                   |                                              |         |
| - Aborted cardiac arrest                                                   | 22 (7.9)                          | 5 (25.0)                                     |         |
| - VT or syncope                                                            | 51 (18.3)                         | 7 (35.0)                                     |         |
| - Unspecified                                                              | 123 (44.2)                        | 7 (35.0)                                     |         |
| - Asymptomatic                                                             | 82 (29.5)                         | ≤3                                           | 0.005   |
| <b>Comorbidities prior to date of diagnosis</b>                            |                                   |                                              |         |
| Diabetes                                                                   | 10 (3.6)                          | ≤3                                           | 0.41    |
| Hypertension                                                               | 28 (10.1)                         | ≤3                                           | 0.75    |
| Ischemic heart disease or prior myocardial infarction                      | 11 (4.0)                          | ≤3                                           | 1       |
| Atrial fibrillation                                                        | 6 (2.2)                           | ≤3                                           | 0.96    |
| Epilepsy                                                                   | 4 (1.4)                           | 0                                            | 1       |
| Any psychiatric diagnosis                                                  | 21 (7.6)                          | ≤3                                           | 1       |
| <b>Concomitant pharmacotherapy, &lt;90 days prior to date of diagnosis</b> |                                   |                                              |         |
| Beta blockers                                                              | 81 (29.1)                         | 8 (40.0)                                     | 0.44    |
| Calcium antagonists                                                        | 7 (2.5)                           | 0                                            | 1       |

|                       |          |    |      |
|-----------------------|----------|----|------|
| ACE inhibitors        | 10 (3.6) | ≤3 | 0.41 |
| Tiazides              | 5 (1.8)  | ≤3 | 0.87 |
| Lipid lowering agents | 11 (4.0) | 0  | 0.77 |
| Antiepileptics        | 5 (1.8)  | ≤3 | 0.87 |
| Anxiolytics           | 8 (2.9)  | ≤3 | 0.29 |
| Antidepressants       | 12 (4.3) | ≤3 | 0.54 |

Supplemental Figure 1

Title: cLQTS disease manifestation according to genotype

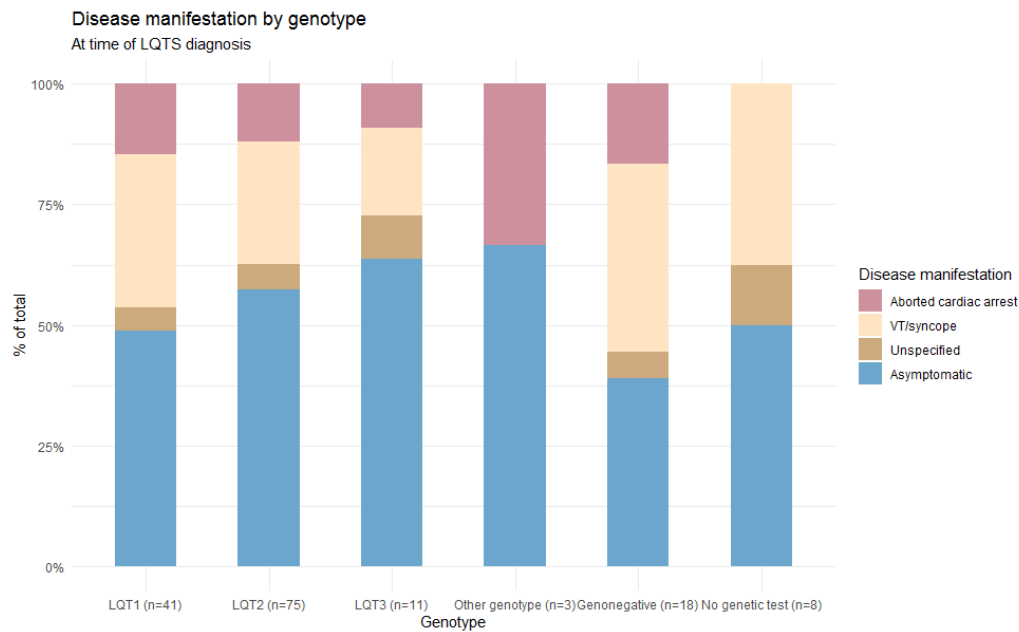

Supplemental Figure 2

Title: Workforce attachment according to genotype

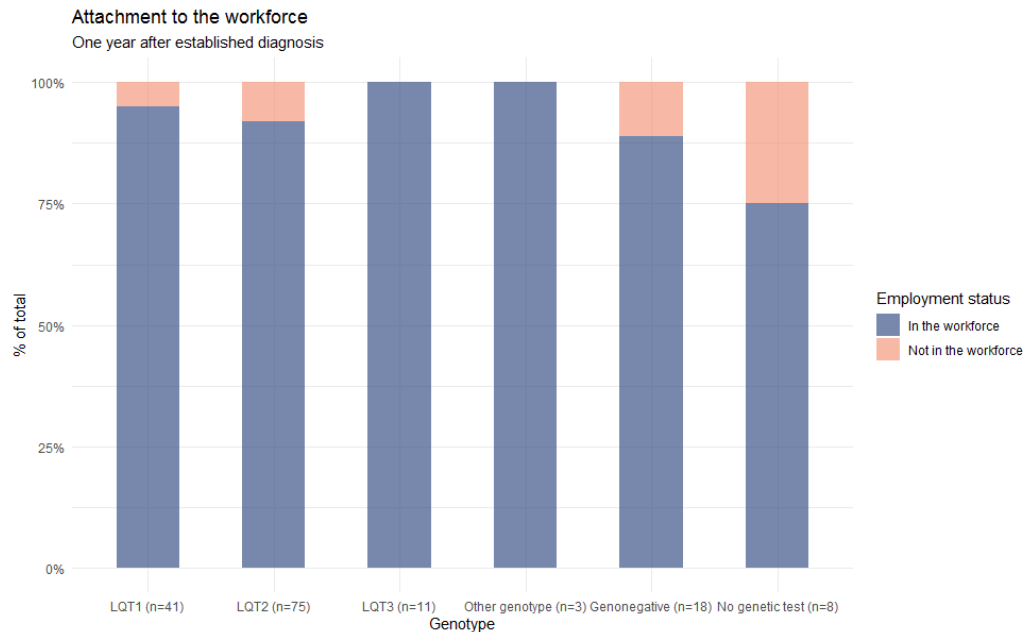

Supplemental Figure 3

Title: Genotype distribution according to workforce attachment

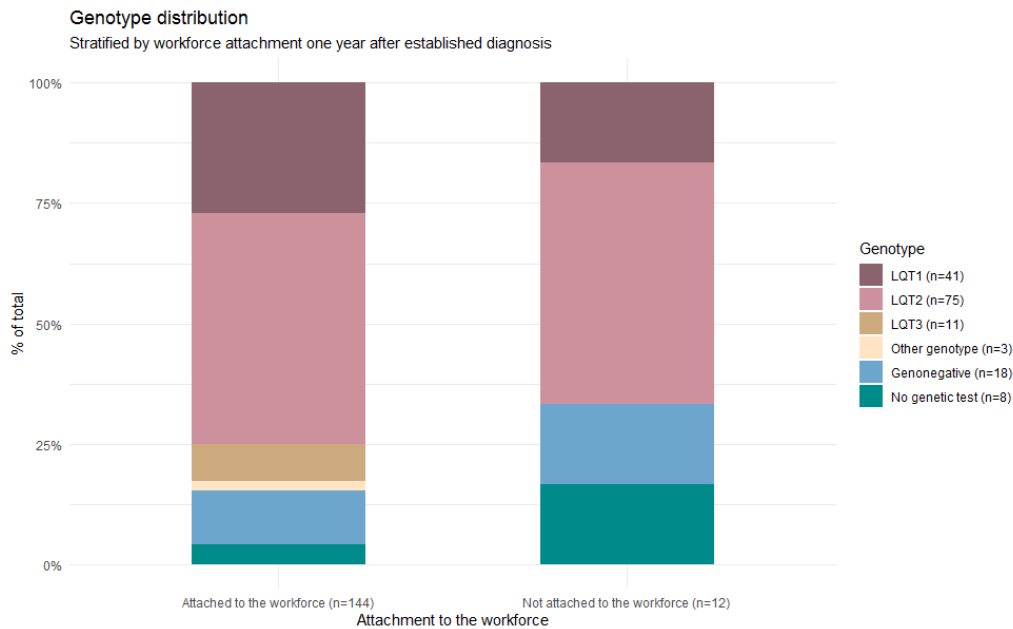

Supplemental Figure 4

Title: Odds ratio of detachment from the workforce among patients with cLQTS, six months after diagnosis

Legend: Forest plot showing odds ratio of detachment from the workforce for different risk factors within the group of cLQTS patients six months after diagnosis with cLQTS.

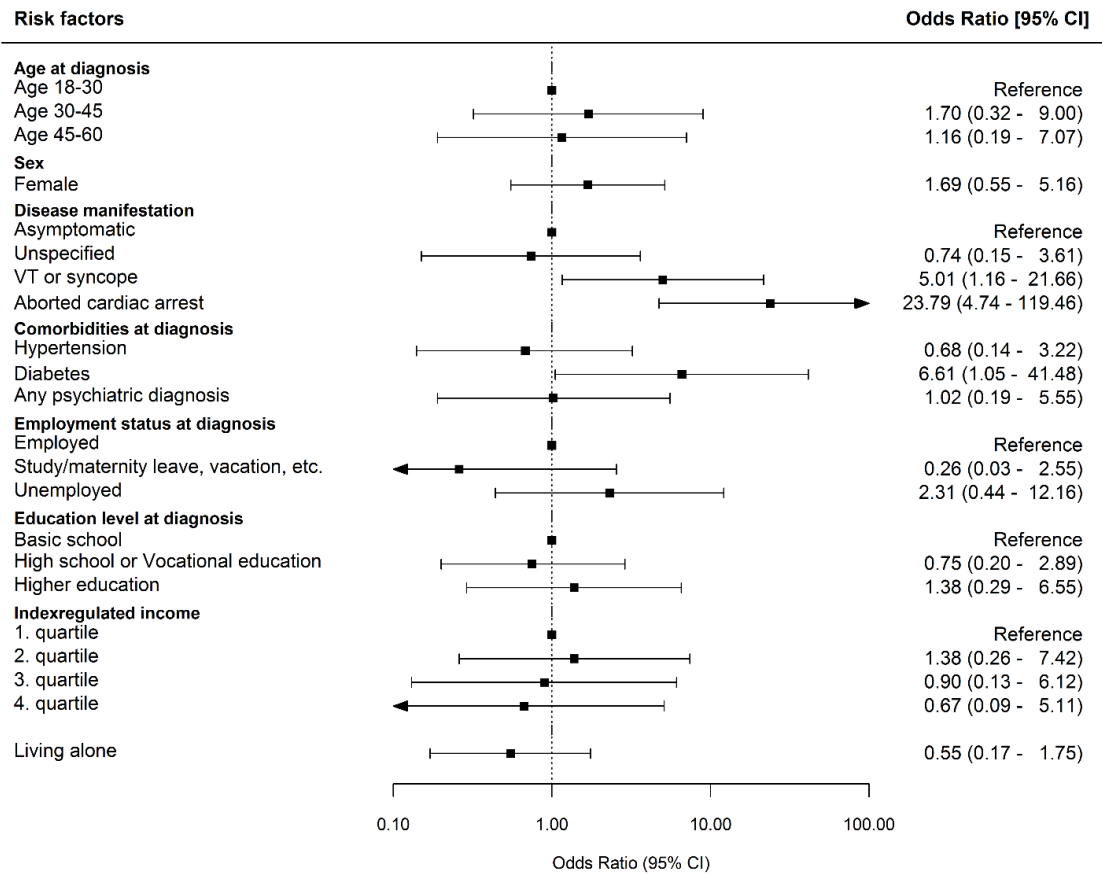

**Supplemental Figure 5**

**Title: Workforce attachment after cLQTS diagnosis according to disease manifestation and age-, sex-, and employment status-matched controls**

Legend: Bar chart showing proportion of patients with cLQTS (stratified by disease manifestation) and matched control population attached to the workforce (A)three years and (B)five years after time of diagnosis (index date for control population); ACA, aborted cardiac arrest; VT, ventricular tachycardia

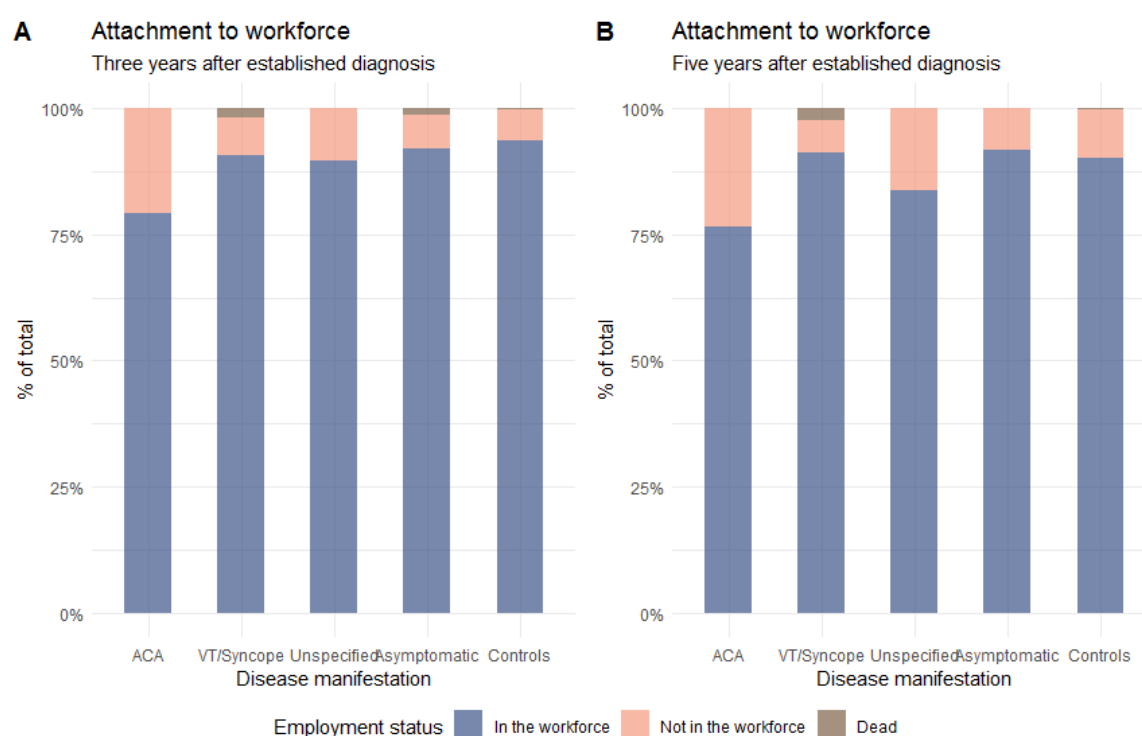

**Supplemental Appendix****Codes for treatment and diagnosis definition**

| <b>Diagnoses/comorbidities</b>                        | <b>ICD codes</b>                                                                                                                                                                                                                                                                                                                                                                                                        |
|-------------------------------------------------------|-------------------------------------------------------------------------------------------------------------------------------------------------------------------------------------------------------------------------------------------------------------------------------------------------------------------------------------------------------------------------------------------------------------------------|
| Aborted cardiac arrest                                | I469, I460, I490, I490B                                                                                                                                                                                                                                                                                                                                                                                                 |
| Anoxic brain damage                                   | G931                                                                                                                                                                                                                                                                                                                                                                                                                    |
| Any psychiatric disease                               | F                                                                                                                                                                                                                                                                                                                                                                                                                       |
| Atrial fibrillation                                   | I48                                                                                                                                                                                                                                                                                                                                                                                                                     |
| Epilepsy                                              | G40, G41                                                                                                                                                                                                                                                                                                                                                                                                                |
| Ischemic heart disease or prior myocardial infarction | I20-25                                                                                                                                                                                                                                                                                                                                                                                                                  |
| Syncope                                               | R559                                                                                                                                                                                                                                                                                                                                                                                                                    |
| Ventricular tachycardia                               | I470, I472, I472A, I472B, I472D                                                                                                                                                                                                                                                                                                                                                                                         |
| <b>Therapy</b>                                        | <b>ATC codes</b>                                                                                                                                                                                                                                                                                                                                                                                                        |
| ACE-inhibitors                                        | C09A                                                                                                                                                                                                                                                                                                                                                                                                                    |
| Antiarrhythmic drugs                                  | C01B                                                                                                                                                                                                                                                                                                                                                                                                                    |
| Antidepressants                                       | N06A                                                                                                                                                                                                                                                                                                                                                                                                                    |
| Anxiolytics                                           | N05B, N05C                                                                                                                                                                                                                                                                                                                                                                                                              |
| $\beta$ blockers                                      | C07                                                                                                                                                                                                                                                                                                                                                                                                                     |
| Calcium channel blockers                              | C08                                                                                                                                                                                                                                                                                                                                                                                                                     |
| Lipid lowering drugs                                  | C10                                                                                                                                                                                                                                                                                                                                                                                                                     |
| Loop diuretics                                        | C03C                                                                                                                                                                                                                                                                                                                                                                                                                    |
| Thiazides                                             | C03A                                                                                                                                                                                                                                                                                                                                                                                                                    |
| <b>Comorbidities based (partly) on ATC codes</b>      | <b>ATC or ICD codes</b>                                                                                                                                                                                                                                                                                                                                                                                                 |
| Diabetes <sup>1</sup>                                 | Diagnosis code within 5 years of diagnosis of ICD10: E10-E14 <i>and/or</i><br>A dispensed prescription within 180 days of diagnosis of the following:<br>ATC: A10                                                                                                                                                                                                                                                       |
| Hypertension <sup>2</sup>                             | 2 or more dispensed prescriptions of the following within 180 days of diagnosis (ATC):<br>$\alpha$ adrenergic blockers: C02A, C02B, C02C<br>Non-loop diuretics: C02DA, C02L, C03A, C03B, C03D, C03E, C03X, C07B, C07C, C07D, C08G, C09BA, C09DA, C09XA52<br>Vasodilators: C02DB, C02DD, C02DG<br>$\beta$ blockers: C07<br>Calcium channel blockers: C07F, C08, C09BB, C09DB<br>Renin–angiotensin system inhibitors: C09 |

## References

1. Schramm TK, Gislason GH, Køber L, Rasmussen S, Rasmussen JN, Abildstrøm SZ, Hansen ML, Folke F, Buch P, Madsen M, Vaag A, Torp-Pedersen C. Diabetes patients requiring glucose-lowering therapy and nondiabetics with a prior myocardial infarction carry the same cardiovascular risk: a population study of 3.3 million people. *Circulation* 2008;**117**:1945–1954.
2. Olesen JB, Lip GYH, Hansen ML, Hansen PR, Tolstrup JS, Lindhardsen J, Selmer C, Ahlehoff O, Olsen A-MS, Gislason GH, Torp-Pedersen C. Validation of risk stratification schemes for predicting stroke and thromboembolism in patients with atrial fibrillation: nationwide cohort study. *BMJ* 2011;**342**:d124.
